# Supplementary material for: Living with an imperfect cell wall: compensation of femAB inactivation in Staphylococcus aureus
Source: PubMed Central journal article supplement (PMC2045680; doi:10.1186/1471-2164-8-307), 2007-09-04
Supplement: 1471-2164-8-307-S1.pdf [file 1471-2164-8-307-S1.pdf]

**Additional file 1.** Genes found differentially expressed in the *femAB+* backcross BB1305 compared to the wild type BB903. The selection of regulated genes is based on statistical significance of moderated *t*-scores and thus also includes genes with a  $\log_2(\text{fold change}) < |1|$ . The genes are clustered according to their cellular main role as in the *S. aureus* N315 genome annotation on the DOGAN website ([http://www.bio.nite.go.jp/dogan/MicroTop?GENOME\\_ID=n315](http://www.bio.nite.go.jp/dogan/MicroTop?GENOME_ID=n315), as of September 24, 2006).

---

**CATEGORY**

**Process**

| ORF ID | Gene | Product | $\log_2(\text{fold change})$ | <i>p</i> -value |
|--------|------|---------|------------------------------|-----------------|
|--------|------|---------|------------------------------|-----------------|

---

**CELL ENVELOPE AND CELLULAR PROCESSES**

**Cell wall**

down

|        |             |                                           |       |      |
|--------|-------------|-------------------------------------------|-------|------|
| SA0793 | <i>dltA</i> | D-alanine-D-alanyl carrier protein ligase | -1.03 | 0.02 |
| SA1283 | <i>pbpB</i> | PBP2                                      | -0.47 | 0.04 |

**Membrane bioenergetics (electron transport chain and ATP synthase)**

down

|        |  |                                                    |       |        |
|--------|--|----------------------------------------------------|-------|--------|
| SA0937 |  | cytochrome D ubiquinol oxidase subunit 1 homologue | -0.70 | <0.005 |
|--------|--|----------------------------------------------------|-------|--------|

up

|        |  |                                                               |      |        |
|--------|--|---------------------------------------------------------------|------|--------|
| SA0210 |  | hypothetical protein, similar to NADH-dependent dehydrogenase | 1.84 | <0.005 |
| SA0211 |  | hypothetical protein, similar to NADH-dependent dehydrogenase | 1.65 | <0.005 |

**Transport / binding proteins and lipoproteins**

down

|        |             |                                                                                           |       |        |
|--------|-------------|-------------------------------------------------------------------------------------------|-------|--------|
| SA0617 | <i>vraG</i> | ABC transporter permease                                                                  | -0.80 | 0.04   |
| SA0640 |             | hypothetical protein, similar to ABC transporter required for expression of cytochrome bd | -0.57 | 0.04   |
| SA0655 | <i>fruA</i> | fructose specific permease                                                                | -1.28 | 0.01   |
| SA0691 |             | lipoprotein, similar to ferrichrome ABC transporter                                       | -0.77 | 0.02   |
| SA0794 | <i>dltB</i> | DltB membrane protein                                                                     | -1.30 | 0.01   |
| SA0796 | <i>dltD</i> | poly(glycerophosphate chain) D-alanine transfer protein                                   | -1.38 | <0.005 |
| SA0950 | <i>potA</i> | spermidine/putrescine ABC transporter, ATP-binding protein homologue                      | -0.43 | 0.03   |
| SA1042 | <i>pyrP</i> | uracil permease                                                                           | -2.37 | <0.005 |
| SA1183 | <i>opuD</i> | glycine betaine transporter                                                               | -0.83 | 0.03   |
| SA1269 |             | Blt-like protein                                                                          | -1.47 | <0.005 |
| SA1270 |             | hypothetical protein, similar to amino acid permease                                      | -1.10 | 0.01   |
| SA1505 | <i>lysP</i> | lysine-specific permease                                                                  | -0.92 | 0.01   |
| SA1893 |             | lipoprotein precursor                                                                     | -0.75 | 0.02   |
| SA1987 |             | glycine betaine transporter <i>opuD</i> homologue                                         | -1.07 | 0.02   |
| SA2303 |             | hypothetical protein, similar to membrane spanning protein                                | -1.50 | 0.01   |
| SA2339 |             | hypothetical protein, similar to antibiotic transport-associated protein                  | -1.68 | <0.005 |

up

|        |  |                                                                       |      |        |
|--------|--|-----------------------------------------------------------------------|------|--------|
| SA0186 |  | hypothetical protein, similar to sucrose phosphotransferase enzyme II | 1.40 | 0.02   |
| SA0208 |  | maltose/maltodextrin transport permease homologue                     | 1.49 | <0.005 |
| SA0209 |  | maltose/maltodextrin transport permease homologue                     | 2.02 | <0.005 |
| SA0260 |  | hypothetical protein, similar to ribose transporter RbsU              | 0.66 | 0.01   |
| SA0318 |  | hypothetical protein, similar to transport protein SgaT               | 1.53 | <0.005 |

---

**CATEGORY**

| Process |              |                                                                              |  |                                |         |
|---------|--------------|------------------------------------------------------------------------------|--|--------------------------------|---------|
| ORF ID  | Gene         | Product                                                                      |  | log <sub>2</sub> (fold change) | p-value |
| SA0320  |              | hypothetical protein, similar to PTS fructose-specific enzyme IIBC component |  | 2.26                           | <0.005  |
| SA0599  |              | ATP-binding cassette transporter A                                           |  | 0.45                           | 0.04    |
| SA1140  | <i>glpF</i>  | glycerol uptake facilitator                                                  |  | 1.39                           | <0.005  |
| SA2167  | <i>scrA</i>  | PTS system, sucrose-specific IIBC component                                  |  | 0.70                           | 0.02    |
| SA2235  | <i>opuCC</i> | glycine betaine/carnitine/choline ABC transporter (osmoprotec) <i>opuCC</i>  |  | 0.90                           | 0.01    |
| SA2426  | <i>arcD</i>  | arginine/ornithine antiporter                                                |  | 1.37                           | <0.005  |

**INFORMATION PATHWAYS****DNA modification and repair**up

|        |  |                                                                      |  |      |      |
|--------|--|----------------------------------------------------------------------|--|------|------|
| SA1512 |  | hypothetical protein, similar to formamidopyrimidine-DNA glycosylase |  | 0.51 | 0.04 |
|--------|--|----------------------------------------------------------------------|--|------|------|

**DNA recombination**up

|        |  |                                          |  |      |      |
|--------|--|------------------------------------------|--|------|------|
| SA1313 |  | probable ATP-dependent DNA helicase RecQ |  | 0.61 | 0.02 |
|--------|--|------------------------------------------|--|------|------|

**DNA replication**up

|        |             |                                 |  |      |        |
|--------|-------------|---------------------------------|--|------|--------|
| SA1525 | <i>dnaE</i> | DNA polymerase III, alpha chain |  | 0.66 | <0.005 |
|--------|-------------|---------------------------------|--|------|--------|

**Protein folding**down

|        |             |                      |  |       |        |
|--------|-------------|----------------------|--|-------|--------|
| SA1409 | <i>dnaK</i> | DnaK protein (HSP70) |  | -0.71 | <0.005 |
|--------|-------------|----------------------|--|-------|--------|

up

|        |             |                                               |  |      |      |
|--------|-------------|-----------------------------------------------|--|------|------|
| SA1659 | <i>prsA</i> | peptidyl-prolyl cis/trans isomerase homologue |  | 1.03 | 0.01 |
|--------|-------------|-----------------------------------------------|--|------|------|

**Protein synthesis**down

|        |             |                       |  |       |      |
|--------|-------------|-----------------------|--|-------|------|
| SA0009 | <i>serS</i> | seryl-tRNA synthetase |  | -0.75 | 0.02 |
|--------|-------------|-----------------------|--|-------|------|

|        |             |                       |  |       |        |
|--------|-------------|-----------------------|--|-------|--------|
| SA0475 | <i>lysS</i> | lysyl-tRNA synthetase |  | -0.56 | <0.005 |
|--------|-------------|-----------------------|--|-------|--------|

|        |             |                                |  |       |      |
|--------|-------------|--------------------------------|--|-------|------|
| SA0496 | <i>rplA</i> | 50S ribosomal protein L1 (BL1) |  | -0.62 | 0.04 |
|--------|-------------|--------------------------------|--|-------|------|

|        |  |                                         |  |       |      |
|--------|--|-----------------------------------------|--|-------|------|
| SA0959 |  | GTP-binding elongation factor homologue |  | -0.76 | 0.03 |
|--------|--|-----------------------------------------|--|-------|------|

|        |             |                          |  |       |      |
|--------|-------------|--------------------------|--|-------|------|
| SA1456 | <i>aspS</i> | aspartyl-tRNA synthetase |  | -0.86 | 0.03 |
|--------|-------------|--------------------------|--|-------|------|

|        |             |                          |  |       |      |
|--------|-------------|--------------------------|--|-------|------|
| SA2041 | <i>rpsC</i> | 30S ribosomal protein S3 |  | -0.73 | 0.01 |
|--------|-------------|--------------------------|--|-------|------|

**RNA synthesis**down

|        |             |                                 |  |       |      |
|--------|-------------|---------------------------------|--|-------|------|
| SA0501 | <i>rpoC</i> | RNA polymerase beta-prime chain |  | -0.55 | 0.01 |
|--------|-------------|---------------------------------|--|-------|------|

|        |             |                                     |  |       |        |
|--------|-------------|-------------------------------------|--|-------|--------|
| SA1041 | <i>pyrR</i> | pyrimidine operon repressor chain A |  | -1.80 | <0.005 |
|--------|-------------|-------------------------------------|--|-------|--------|

|        |  |                                               |  |       |      |
|--------|--|-----------------------------------------------|--|-------|------|
| SA1956 |  | lytic regulatory protein truncated with Tn554 |  | -0.82 | 0.03 |
|--------|--|-----------------------------------------------|--|-------|------|

up

|        |  |                                                          |  |      |        |
|--------|--|----------------------------------------------------------|--|------|--------|
| SA0187 |  | hypothetical protein, similar to transcription regulator |  | 1.90 | <0.005 |
|--------|--|----------------------------------------------------------|--|------|--------|

|        |  |                                                                           |  |      |        |
|--------|--|---------------------------------------------------------------------------|--|------|--------|
| SA0321 |  | hypothetical protein, similar to transcription antiterminator BglG family |  | 2.52 | <0.005 |
|--------|--|---------------------------------------------------------------------------|--|------|--------|

|        |             |                                          |  |      |        |
|--------|-------------|------------------------------------------|--|------|--------|
| SA1339 | <i>malR</i> | maltose operon transcriptional repressor |  | 2.07 | <0.005 |
|--------|-------------|------------------------------------------|--|------|--------|

|        |             |                                  |  |      |      |
|--------|-------------|----------------------------------|--|------|------|
| SA1700 | <i>vraR</i> | two-component response regulator |  | 0.38 | 0.05 |
|--------|-------------|----------------------------------|--|------|------|

|        |             |                          |  |      |      |
|--------|-------------|--------------------------|--|------|------|
| SA1847 | <i>scrR</i> | sucrose operon repressor |  | 0.63 | 0.01 |
|--------|-------------|--------------------------|--|------|------|

|        |             |                                            |  |      |      |
|--------|-------------|--------------------------------------------|--|------|------|
| SA2295 | <i>gntR</i> | gluconate operon transcriptional repressor |  | 1.49 | 0.02 |
|--------|-------------|--------------------------------------------|--|------|------|

|        |  |                                                          |  |      |      |
|--------|--|----------------------------------------------------------|--|------|------|
| SA2320 |  | hypothetical protein, similar to regulatory protein PfoR |  | 1.08 | 0.03 |
|--------|--|----------------------------------------------------------|--|------|------|

|        |  |                                                                                 |  |      |        |
|--------|--|---------------------------------------------------------------------------------|--|------|--------|
| SA2424 |  | hypothetical protein, similar to transcription regulator Crp/Fnr family protein |  | 1.28 | <0.005 |
|--------|--|---------------------------------------------------------------------------------|--|------|--------|

---

**CATEGORY****Process**

| <b>ORF ID</b> | <b>Gene</b> | <b>Product</b> | <b>log<sub>2</sub>(fold change)</b> | <b>p-value</b> |
|---------------|-------------|----------------|-------------------------------------|----------------|
|---------------|-------------|----------------|-------------------------------------|----------------|

---

**INTERMEDIARY METABOLISM****Metabolism of lipids**down

|        |             |                                               |       |        |
|--------|-------------|-----------------------------------------------|-------|--------|
| SA0548 | <i>mvaD</i> | mevalonate diphosphate decarboxylase          | -0.62 | 0.02   |
| SA0843 | <i>fab</i>  | 3-oxoacyl-[acyl-carrier-protein] synthase     | -0.81 | 0.03   |
| SA1073 | <i>fabD</i> | malonyl CoA-acyl carrier protein transacylase | -0.60 | 0.01   |
| SA1074 | <i>fabG</i> | 3-oxoacyl-(acyl-carrier protein) reductase    | -0.65 | <0.005 |

up

|        |             |                                                                          |      |        |
|--------|-------------|--------------------------------------------------------------------------|------|--------|
| SA0220 |             | hypothetical protein, similar to glycerophosphodiester phosphodiesterase | 0.84 | <0.005 |
| SA0820 | <i>glpQ</i> | glycerophosphoryl diester phosphodiesterase                              | 0.59 | 0.03   |
| SA2349 | <i>crtM</i> | squalene synthase                                                        | 0.79 | 0.01   |

**Metabolism of amino acids and related molecules**down

|        |             |                                                     |       |        |
|--------|-------------|-----------------------------------------------------|-------|--------|
| SA1150 | <i>glnA</i> | glutamine-ammonia ligase                            | -1.03 | <0.005 |
| SA1271 |             | threonine deaminase IlvA homologue                  | -0.99 | <0.005 |
| SA1272 |             | alanine dehydrogenase                               | -1.14 | <0.005 |
| SA1608 | <i>metK</i> | S-adenosylmethionine synthetase                     | -0.49 | 0.04   |
| SA1858 | <i>ilvD</i> | dihydroxy-acid dehydratase                          | -0.80 | 0.03   |
| SA1859 | <i>ilvB</i> | acetolactate synthase large subunit                 | -1.18 | 0.05   |
| SA2125 |             | hypothetical protein, similar to formiminoglutamase | -0.79 | 0.04   |

up

|        |             |                                                                       |      |        |
|--------|-------------|-----------------------------------------------------------------------|------|--------|
| SA1012 | <i>argF</i> | ornithine carbamoyltransferase                                        | 1.57 | <0.005 |
| SA2082 | <i>ureA</i> | urease gamma subunit                                                  | 1.73 | <0.005 |
| SA2086 | <i>ureF</i> | urease accessory protein UreF                                         | 0.88 | 0.01   |
| SA2121 | <i>hutI</i> | imidazolonepropionase                                                 | 1.39 | 0.04   |
| SA2122 | <i>hutU</i> | urocanate hydratase                                                   | 2.00 | <0.005 |
| SA2318 |             | hypothetical protein, similar to L-serine dehydratase                 | 0.85 | <0.005 |
| SA2319 |             | hypothetical protein, similar to beta-subunit of L-serine dehydratase | 0.69 | 0.01   |
| SA2425 | <i>arcC</i> | carbamate kinase                                                      | 1.49 | <0.005 |
| SA2427 | <i>arcB</i> | ornithine transcarbamoylase                                           | 1.65 | <0.005 |
| SA2428 | <i>arcA</i> | arginine-deiminase                                                    | 2.04 | <0.005 |

**Metabolism of carbohydrates and related molecules**down

|        |             |                                         |       |        |
|--------|-------------|-----------------------------------------|-------|--------|
| SA1088 | <i>sucC</i> | succinyl-CoA synthetase (beta subunit)  | -0.99 | <0.005 |
| SA1089 | <i>sucD</i> | succinyl-CoA synthetase (alpha subunit) | -0.91 | <0.005 |

up

|        |             |                                              |      |        |
|--------|-------------|----------------------------------------------|------|--------|
| SA0143 | <i>adhE</i> | alcohol-acetaldehyde dehydrogenase           | 0.85 | 0.01   |
| SA0258 | <i>rbsK</i> | probable ribokinase                          | 0.71 | <0.005 |
| SA0304 | <i>nanA</i> | N-acetylneuraminatase lyase subunit          | 1.73 | <0.005 |
| SA0305 |             | hypothetical protein, similar to glucokinase | 1.50 | <0.005 |
| SA0433 |             | alpha-glucosidase                            | 1.53 | 0.01   |
| SA1142 | <i>glpD</i> | aerobic glycerol-3-phosphate dehydrogenase   | 1.10 | 0.04   |
| SA1338 | <i>malA</i> | alpha-D-1,4-glucosidase                      | 1.17 | <0.005 |
| SA1556 | <i>acuC</i> | acetoin utilization protein                  | 1.71 | 0.04   |
| SA2294 | <i>gntK</i> | gluconokinase                                | 1.66 | <0.005 |
| SA2304 | <i>fbp</i>  | fructose-bisphosphatase                      | 0.90 | 0.01   |

| CATEGORY                                                    |              |                                                                  |  |                                |         |
|-------------------------------------------------------------|--------------|------------------------------------------------------------------|--|--------------------------------|---------|
| Process                                                     |              |                                                                  |  |                                |         |
| ORF ID                                                      | Gene         | Product                                                          |  | log <sub>2</sub> (fold change) | p-value |
| <b>Metabolism of coenzymes and prosthetic groups</b>        |              |                                                                  |  |                                |         |
| <u>up</u>                                                   |              |                                                                  |  |                                |         |
| SA1259                                                      | <i>dfrA</i>  | dihydrofolate reductase                                          |  | 0.62                           | <0.005  |
| <b>Metabolism of nucleotides and nucleic acids</b>          |              |                                                                  |  |                                |         |
| <u>down</u>                                                 |              |                                                                  |  |                                |         |
| SA0016                                                      | <i>purA</i>  | adenylosuccinate synthase                                        |  | -1.13                          | 0.03    |
| SA1043                                                      | <i>pyrB</i>  | aspartate transcarbamoylase chain A                              |  | -2.02                          | <0.005  |
| SA1044                                                      | <i>pyrC</i>  | dihydroorotase                                                   |  | -2.67                          | <0.005  |
| SA1046                                                      | <i>pyrAB</i> | carbamoyl-phosphate synthase large chain                         |  | -1.85                          | 0.01    |
| SA1048                                                      | <i>pyrE</i>  | orotate phosphoribosyltransferase                                |  | -1.78                          | 0.01    |
| <u>up</u>                                                   |              |                                                                  |  |                                |         |
| SA0131                                                      | <i>pnp</i>   | purine nucleoside phosphorylase                                  |  | 0.83                           | <0.005  |
| SA1013                                                      |              | hypothetical protein, similar to carbamate kinase                |  | 2.18                           | 0.01    |
| SA2410                                                      | <i>nrdD</i>  | anaerobic ribonucleoside-triphosphate reductase                  |  | 0.96                           | <0.005  |
| <b>NO SIMILARITY</b>                                        |              |                                                                  |  |                                |         |
| <u>up</u>                                                   |              |                                                                  |  |                                |         |
| SA0663                                                      |              | hypothetical protein                                             |  | 1.13                           | <0.005  |
| SA1210                                                      |              | hypothetical protein                                             |  | 0.58                           | 0.02    |
| SA1476                                                      |              | hypothetical protein                                             |  | 1.95                           | <0.005  |
| <b>OTHER FUNCTIONS</b>                                      |              |                                                                  |  |                                |         |
| <b>Adaption to atypical conditions</b>                      |              |                                                                  |  |                                |         |
| <u>up</u>                                                   |              |                                                                  |  |                                |         |
| SA0147                                                      | <i>capD</i>  | capsular polysaccharide synthesis enzyme Cap5D                   |  | 0.81                           | <0.005  |
| <b>Detoxification</b>                                       |              |                                                                  |  |                                |         |
| <u>up</u>                                                   |              |                                                                  |  |                                |         |
| SA1238                                                      |              | hypothetical protein, similar to tellurite resistance protein    |  | 0.54                           | 0.04    |
| <b>Miscellaneous</b>                                        |              |                                                                  |  |                                |         |
| <u>down</u>                                                 |              |                                                                  |  |                                |         |
| SA1193                                                      | <i>fmtC</i>  | oxacillin resistance-related FmtC protein                        |  | -1.12                          | <0.005  |
| <b>Pathogenic factors (toxins and colonization factors)</b> |              |                                                                  |  |                                |         |
| <u>down</u>                                                 |              |                                                                  |  |                                |         |
| SA0587                                                      |              | lipoprotein, streptococcal adhesin PsaA homologue                |  | -0.55                          | 0.01    |
| <u>up</u>                                                   |              |                                                                  |  |                                |         |
| SA0091                                                      | <i>plc</i>   | 1-phosphatidylinositol phosphodiesterase precursor               |  | 1.69                           | 0.02    |
| SA0900                                                      | <i>sspB</i>  | cysteine protease precursor                                      |  | 1.07                           | 0.02    |
| SA1007                                                      |              | alpha-hemolysin precursor                                        |  | 1.64                           | 0.02    |
| SA1630                                                      | <i>spIB</i>  | serine protease SpIB [Pathogenicity island SaPI <sub>n</sub> 3]  |  | 2.48                           | <0.005  |
| SA1752                                                      | <i>(hly)</i> | truncated beta-hemolysin                                         |  | 1.96                           | 0.01    |
| SA1811                                                      | <i>(hly)</i> | truncated beta-hemolysin                                         |  | 2.06                           | <0.005  |
| SA1813                                                      |              | hypothetical protein, similar to leukocidin chain lukM precursor |  | 1.64                           | 0.04    |
| SA2430                                                      | <i>aur</i>   | zinc metalloproteinase aureolysin                                |  | 2.05                           | 0.01    |
| SA2463                                                      | <i>lip</i>   | triacylglycerol lipase precursor                                 |  | 1.68                           | <0.005  |

---

**CATEGORY****Process**

| <b>ORF ID</b> | <b>Gene</b> | <b>Product</b> | <b>log<sub>2</sub>(fold change)</b> | <b>p-value</b> |
|---------------|-------------|----------------|-------------------------------------|----------------|
|---------------|-------------|----------------|-------------------------------------|----------------|

---

**Phage-related functions**up

|        |             |                                                                      |      |        |
|--------|-------------|----------------------------------------------------------------------|------|--------|
| SA0252 | <i>lrgA</i> | holin-like protein LrgA                                              | 1.24 | 0.03   |
| SA0754 |             | hypothetical protein, similar to lactococcal prophage ps3 protein 05 | 1.26 | 0.01   |
| SA1782 |             | hypothetical protein [Bacteriophage phiN315]                         | 1.92 | <0.005 |
| SA1785 |             | hypothetical protein [Bacteriophage phiN315]                         | 2.27 | <0.005 |
| SA1786 |             | hypothetical protein [Bacteriophage phiN315]                         | 2.29 | <0.005 |
| SA1797 |             | hypothetical protein [Bacteriophage phiN315]                         | 2.56 | <0.005 |
| SAS063 |             | hypothetical protein [Bacteriophage phiN315]                         | 2.08 | <0.005 |

**Transposon and IS**up

|        |             |                                                                           |      |      |
|--------|-------------|---------------------------------------------------------------------------|------|------|
| SA2387 | <i>tnpB</i> | transposition regulatory protein TnpB - <i>S. aureus</i> transposon Tn554 | 1.21 | 0.04 |
|--------|-------------|---------------------------------------------------------------------------|------|------|

**SIMILAR TO UNKNOWN PROTEINS**down

|        |  |                                |       |        |
|--------|--|--------------------------------|-------|--------|
| SA0100 |  | conserved hypothetical protein | -0.66 | <0.005 |
| SA0477 |  | conserved hypothetical protein | -1.47 | <0.005 |
| SA0701 |  | conserved hypothetical protein | -0.51 | 0.03   |
| SA1536 |  | conserved hypothetical protein | -0.72 | 0.01   |
| SA2143 |  | conserved hypothetical protein | -0.82 | 0.02   |
| SA2305 |  | conserved hypothetical protein | -0.67 | 0.03   |
| SA2328 |  | conserved hypothetical protein | -0.42 | 0.02   |

up

|        |  |                                |      |        |
|--------|--|--------------------------------|------|--------|
| SA0184 |  | conserved hypothetical protein | 2.35 | <0.005 |
| SA0185 |  | conserved hypothetical protein | 2.43 | <0.005 |
| SA0789 |  | conserved hypothetical protein | 0.54 | 0.04   |
| SA1014 |  | conserved hypothetical protein | 1.54 | <0.005 |
| SA1258 |  | conserved hypothetical protein | 0.43 | 0.04   |
| SA1661 |  | conserved hypothetical protein | 0.45 | 0.05   |
| SA1690 |  | conserved hypothetical protein | 0.60 | 0.01   |

---
